# Supplementary material for: Effects of Protein-Rich Nutritional Composition Supplementation on Sarcopenia Indices and Physical Activity during Resistance Exercise Training in Older Women with Knee Osteoarthritis
Source: MDPI journal article supplement (doi:10.3390/nu13082487), 2021-07-21
Supplement: s1 [file s1]

**Table S1.** Exercise progression protocol.

| Intensity:<br>level of resistance<br>(Theraband color) | Time progression (week)      |               |                              |               |               |               |               |               |               |               |               |               |
|--------------------------------------------------------|------------------------------|---------------|------------------------------|---------------|---------------|---------------|---------------|---------------|---------------|---------------|---------------|---------------|
|                                                        | 1st                          | 2nd           | 3rd                          | 4th           | 5th           | 6th           | 7th           | 8th           | 9th           | 10th          | 11th          | 12th          |
|                                                        | Supervised exercise training |               | Home-based exercise training |               |               |               |               |               |               |               |               |               |
| Yellow                                                 | X                            | X             |                              |               |               |               |               |               |               |               |               |               |
| Red                                                    |                              |               | X                            | X             |               |               |               |               |               |               |               |               |
| Green                                                  |                              |               |                              |               | X             | X             |               |               |               |               |               |               |
| Blue                                                   |                              |               |                              |               |               |               | X             | X             |               |               |               |               |
| Black                                                  |                              |               |                              |               |               |               |               |               | X             | X             |               |               |
| Silver                                                 |                              |               |                              |               |               |               |               |               |               |               | X             | X             |
| Exercise Loading                                       |                              |               |                              |               |               |               |               |               |               |               |               |               |
| Repetition                                             | 10–20                        | 10–20         | 10–20                        | 10–20         | 10–20         | 10–20         | 10–20         | 10–20         | 10–20         | 10–20         | 10–20         | 10–20         |
| Set                                                    | 3                            | 3             | 3                            | 3             | 3             | 3             | 3             | 3             | 3             | 3             | 3             | 3             |
| RPE <sup>a</sup>                                       | Moderate–High                | Moderate–High | Moderate–High                | Moderate–High | Moderate–High | Moderate–High | Moderate–High | Moderate–High | Moderate–High | Moderate–High | Moderate–High | Moderate–High |

“X” denoted the intensity of resistance which is determined by Theraband color.

<sup>a</sup>Perception of effort using a 15-point Borg RPE scale. Moderate and high level of RPE correspond to a rating of 13 (somewhat hard) and 15 (hard) respectively, on a Borg RPE scale.

RPE, ratings of perceived exertion.

**Table S2.** Elastic resistance exercise regime.

| Movement                                                                                                                       | Intensity<br>(Repetition/Set) | Targeted<br>muscle group            | Duration<br>(Min) |
|--------------------------------------------------------------------------------------------------------------------------------|-------------------------------|-------------------------------------|-------------------|
| <b>A. Warm-up</b>                                                                                                              |                               |                                     |                   |
| 1. Mobility exercise of the neck, upper limbs, and back                                                                        |                               | Upper quarter flexors and extensors | 5                 |
| 2. Global flexion-extension of the lower limb                                                                                  |                               | Lower quarter flexors and extensors | 5                 |
| <b>B. Upper quarter</b>                                                                                                        |                               |                                     |                   |
| 1. Seated chest press                                                                                                          | 10–20/3                       | Upper quarter extensors             | 5–10              |
| 2. Seated row                                                                                                                  | 10–20/3                       | Upper quarter flexors               | 5–10              |
| 3. Seated shoulder press                                                                                                       | 10–20/3                       | Shoulder gargle muscle groups       | 5–10              |
| <b>C. Lower quarter</b>                                                                                                        |                               |                                     |                   |
| 1. Concentric–eccentric hip circumduction                                                                                      | 10–20/3                       | Hip gargle muscle groups            | 5–10              |
| 2. Leg press                                                                                                                   | 10–20/3                       | Lower quarter extensors             | 5–10              |
| 3. Leg curl                                                                                                                    | 10–20/3                       | Lower quarter flexors               | 5–10              |
| <b>D. Cool down</b>                                                                                                            |                               |                                     |                   |
| 1. Gentle stretching exercise<br>- Arm stretch<br>- Chest stretch<br>- Core stretch                                            |                               | Upper quarter flexors and extensors | 5                 |
| 2 Gentle stretching exercise<br>- Standing quad stretch<br>- Seated single-leg hamstring stretch<br>- Unilateral knee-to-chest |                               | Lower quarter flexors and extensors | 5                 |

**Table S3.** Nutritional composition of the protein supplementation.

| Nutrient               | Per serving (24 g) |
|------------------------|--------------------|
| Energy (Kcal)          | 85                 |
| Protein (g)            | 14                 |
| Fat (g)                | 0.6                |
| Saturated fat (g)      | 0.3                |
| Trans fat (g)          | 0                  |
| Carbohydrate (g)       | 7                  |
| Sugar (g)              | 5                  |
| Diet fiber (g)         | 2                  |
| BCAA (g)               | 4.4                |
| Leucine                | 2.2                |
| Isoleucine             | 1.1                |
| Valine                 | 1.1                |
| Glutamine <sup>a</sup> | 2.4                |
| Arginine               | 0.5                |
| Taurine                | 0.4                |
| Na (mg)                | 65                 |
| K (mg)                 | 80                 |
| Ca (mg)                | 200                |
| P (mg)                 | 120                |

<sup>a</sup>Including glutamic acid. BCAA, branched-chain amino acid.

**Table S4.** Mean values of primary and secondary outcome measures between the experimental and control groups.

| Variables <sup>a</sup> | Control group (n = 36) <sup>b</sup> |               | Experimental group (n = 36) <sup>b</sup> |               |
|------------------------|-------------------------------------|---------------|------------------------------------------|---------------|
|                        | Baseline                            | Posttest      | Baseline                                 | Posttest      |
| Sarcopenic indices     |                                     |               |                                          |               |
| SMI, kg/m <sup>2</sup> | 14.93 ± 1.91                        | 15.13 ± 1.84  | 14.43 ± 1.89                             | 14.78 ± 1.95  |
| AMI, kg/m <sup>2</sup> | 6.70 ± 1.53                         | 6.85 ± 1.35   | 6.67 ± 1.36                              | 7.04 ± 1.20   |
| Walking speed (m/s)    | 0.75 ± 0.30                         | 0.77 ± 0.14   | 0.72 ± 0.29                              | 0.87 ± 0.30   |
| Muscle quality, kg/kg  | 4.05 ± 1.80                         | 4.49 ± 2.11   | 4.02 ± 1.58                              | 4.58 ± 1.77   |
| PA (MET-hr/week)       |                                     |               |                                          |               |
| Total                  | 20.90 ± 8.91                        | 57.97 ± 25.19 | 19.62 ± 11.06                            | 84.03 ± 39.61 |
| Vigorous               | 1.97 ± 1.93                         | 13.32 ± 8.89  | 2.07 ± 2.31                              | 18.94 ± 21.14 |
| Moderate               | 5.66 ± 3.28                         | 10.71 ± 6.93  | 4.79 ± 2.68                              | 13.81 ± 7.23  |
| Light                  | 13.27 ± 8.91                        | 33.94 ± 22.79 | 12.77 ± 10.13                            | 51.27 ± 24.94 |
| WOMAC <sup>c</sup>     |                                     |               |                                          |               |
| Global (0–100)         | 59.90 ± 11.26                       | 32.94 ± 8.89  | 58.13 ± 10.52                            | 24.28 ± 8.03  |
| Pain (0–20)            | 12.06 ± 2.61                        | 7.81 ± 1.51   | 11.22 ± 2.53                             | 6.36 ± 3.42   |
| PF (0–68)              | 40.19 ± 9.55                        | 20.53 ± 3.23  | 39.00 ± 8.76                             | 13.75 ± 3.33  |

<sup>a</sup>SMI, skeletal muscle mass index; AMI, appendicular mass index; PA, physical activity; WOMAC, Western Ontario and McMaster Universities Osteoarthritis Index.

<sup>b</sup>Data is presented as mean and standard deviation.

**Table S5.** Adherence of all patients to the resistance exercise program.

|               | Resistance level used, n (%) <sup>a</sup> |                    |                             | Exercise volume in each session, mean (SD) |                |                           |                    |                |                           |                                              |
|---------------|-------------------------------------------|--------------------|-----------------------------|--------------------------------------------|----------------|---------------------------|--------------------|----------------|---------------------------|----------------------------------------------|
|               | Control group                             | Experimental group | <i>P</i> value <sup>b</sup> | Control group                              |                |                           | Experimental group |                |                           | <i>P</i> value for total volume <sup>d</sup> |
|               |                                           |                    |                             | Set/movement                               | Repetition/set | Total volume <sup>c</sup> | Set/movement       | Repetition/set | Total volume <sup>c</sup> |                                              |
| Upper quarter |                                           |                    |                             |                                            |                |                           |                    |                |                           |                                              |
| Yellow        | 36 (100)                                  | 36 (100)           |                             | 3.22 (0.76)                                | 19.31 (2.12)   | 61.94 (14.46)             | 3.17 (0.69)        | 19.58 (1.84)   | 62.08 (15.28)             | 0.969                                        |
| Red           | 36 (100)                                  | 36 (100)           |                             | 3.56 (1.16)                                | 19.02 (2.14)   | 69.03 (24.98)             | 3.58 (1.13)        | 18.89 (2.70)   | 67.92 (24.09)             | 0.848                                        |
| Green         | 36 (100)                                  | 36 (100)           |                             | 3.69 (1.23)                                | 19.17 (2.12)   | 71.11 (26.27)             | 3.81 (1.26)        | 18.75 (2.77)   | 71.53 (26.13)             | 0.946                                        |
| Blue          | 34 (94.44)                                | 32 (88.89)         | 0.394                       | 3.68 (1.46)                                | 19.69 (1.25)   | 71.88 (21.91)             | 4.24 (1.49)        | 19.26 (2.18)   | 80.29 (27.36)             | 0.171                                        |
| Black         | 29 (80.56)                                | 30 (83.33)         | 0.759                       | 3.46 (1.06)                                | 19.79 (1.82)   | 67.92 (18.88)             | 3.80 (1.28)        | 19.00 (2.62)   | 70.25 (20.29)             | 0.697                                        |
| Silver        | 26 (72.22)                                | 28 (77.78)         | 0.586                       | 2.90 (0.31)                                | 17.67 (3.88)   | 51.33 (12.99)             | 2.95 (0.24)        | 18.33 (2.82)   | 52.29 (10.11)             | 0.768                                        |

<sup>a</sup>Data denotes the number of patients who successfully yielded the indicated resistance level for at least one exercise session.

<sup>b</sup>Pearson Chi-Square test.

<sup>c</sup>Data denotes the mean value of total repetitions acted for each movement and is calculated as set x repetition.

<sup>d</sup>Independent t test.
